# Supplementary material for: Phenotypic and genomic features shaping the activity of a novel T4-like phage against clinical multidrug-resistant Klebsiella pneumoniae
Source: Research Square preprint supplement (doi:10.21203/rs.3.rs-8388477/v1), 2026-01-07
Supplement: Supplementary file 1 [file 5320b8a41ac5f5eed5f6a9b4.docx]

**Supplementary Material**

**Table 1** Genomic characteristics of analyzed multidrug-resistant Klebsiella pneumoniae clinical strains, including assembly metrics, composition, and genetic content.

| ID | Size | N°. Contigs | Complet. a | G+C% | N50 | tRNAs | CDSs | ARGsb | ARGs phenotype |
| --- | --- | --- | --- | --- | --- | --- | --- | --- | --- |
| CKP 02 | 5.28 Mbp | 553 | 96.0% | 57.3% | 20,043 | 72 | 5,986 | *AAC(6')-Ib/AAC(6')-II, APH(3')-III/APH(3')-IV/APH(3')-VI/APH(3')-VII, CTX-M family, NDM family, SHV family, TEM family* | Aztreonam, Cefepime |
| CKP 03 | 5.70 Mbp | 304 | 97.7% | 56.9% | 42,971 | 72 | 6,706 | *AAC(3)-II,III,IV,VI,VIII,IX,X, AAC(6')-Ib/AAC(6')-II, APH(3'')-I, APH(6)-Ic/APH(6)-Id, CatB family, CTX-M family, KPC family, Mph(E)/Mph(G) family, OXA-1 family, OXA-10 family, SHV family* | Aztreonam, Cefepime, Cefoxitin, Ciprofloxacin, Ertapenem, Gentamicin, Imipenem, Levofloxacin, Meropenem, Piperacillin/Tazobactam, Tetracycline, Tobramycin, Trimethoprim/Sulfamethoxazole |
| CKP 05 | 5.79 Mbp | 175 | 98.6% | 57.01% | 102,119 | 72 | 6,183 | *AAC(3)-II,III,IV,VI,VIII,IX,X, AAC(6')-Ib/AAC(6')-II, CatA1/CatA4 family, CTX-M family, KPC family, Mph(A) family, OXA-2 family, SHV family, TEM family* | Amikacin, Cefepime, Cefoxitin, Ciprofloxacin, Ertapenem, Gentamicin, Imipenem, Meropenem, Piperacillin/Tazobactam, Tobramycin, Trimethoprim/Sulfamethoxazole |
| CKP 06 | 5.57 Mbp | 252 | 99.6% | 56.9% | 39,588 | 65 | 6,780 | *AAC(3)-II,III,IV,VI,VIII,IX,X, APH(3'')-I, APH(6)-Ic/APH(6)-Id, CTX-M family, NDM family, SHV family, TEM family* | Aztreonam, Cefepime, Cefoxitin, Ciprofloxacin, Gentamicin, Tetracycline |
| CKP 07 | 5.83 Mbp | 342 | 97.6% | 56.6% | 34,316 | 65 | 6,929 | *AAC(3)-II,III,IV,VI,VIII,IX,X, AAC(6')-Ib/AAC(6')-II, CatA1/CatA4 family, CatB family, CTX-M family, NDM family, OXA-1 family, OXA-2 family, SHV family, TEM family* | Cefepime, Cefoxitin, Ciprofloxacin, Gentamicin, Imipenem, Tobramycin, Trimethoprim/Sulfamethoxazole |
| CKP 08 | 5.45 Mbp | 363 | 94.1% | 56.9% | 26,064 | 72 | 6,428 | *AAC(3)-II,III,IV,VI,VIII,IX,X, APH(3'')-I, APH(3')-I, APH(6)-Ic/APH(6)-Id, CatA1/CatA4 family, CTX-M family, KPC family, Mph(A) family, SHV family, TEM family* | Amikacin, Aztreonam, Cefoxitin, Ciprofloxacin, Ertapenem, Gentamicin, Imipenem, Levofloxacin, Meropenem, Piperacillin/Tazobactam, Trimethoprim/Sulfamethoxazole |
| CKP 09 | 5.90 Mbp | 274 | 96.1% | 56.6% | 56,676 | 71 | 6,677 | *AAC(3)-II,III,IV,VI,VIII,IX,X, AAC(6')-Ib/AAC(6')-II, CatA1/CatA4 family, CatB family, CTX-M family, NDM family, OXA-1 family, OXA-2 family, SHV family, TEM family* | Cefepime, Cefoxitin, Ciprofloxacin, Gentamicin, Imipenem, Tobramycin, Trimethoprim/Sulfamethoxazole |
| CKP 10 | 5.69 Mbp | 201 | 99.2% | 56.9% | 60,872 | 74 | 6,497 | *AAC(6')-Ib/AAC(6')-II, APH(3'')-I, APH(6)-Ic/APH(6)-Id, CatB family, CTX-M family, KPC family, Mph(E)/Mph(G) family, OXA-1 family, SHV family, TEM family* | Aztreonam, Cefepime, Cefoxitin, Ciprofloxacin, Ertapenem, Gentamicin, Imipenem, Levofloxacin, Meropenem, Piperacillin/Tazobactam, Tetracycline, Tobramycin, Trimethoprim/Sulfamethoxazole |
| CKP 15 | 5.76 Mbp | 134 | 100% | 57.12% | 165,325 | 74 | 5,915 | *AAC(3)-II,III,IV,VI,VIII,IX,X, AAC(6')-Ib/AAC(6')-II, CatA1/CatA4 family, CTX-M family, KPC family, SHV family, TEM family* | Amikacin, Cefepime, Cefoxitin, Ciprofloxacin, Ertapenem, Gentamicin, Imipenem, Meropenem, Piperacillin/Tazobactam, Tobramycin |
| CKP 17 | 5.76 Mbp | 175 | 99.0% | 57.03% | 79,013 | 72 | 6,396 | *AAC(3)-II,III,IV,VI,VIII,IX,X, APH(3'')-I, APH(3')-I, APH(6)-Ic/APH(6)-Id, CatA1/CatA4 family, CTX-M family, KPC family, Mph(A) family, SHV family, TEM family* | Aztreonam, Cefepime, Cefoxitin, Ciprofloxacin, Ertapenem, Gentamicin, Imipenem, Levofloxacin, Meropenem, Piperacillin/Tazobactam, Tobramycin, Trimethoprim/Sulfamethoxazole |
| CKP 21 | 5.62 Mbp | 278 | 96.8% | 56.9% | 41,057 | 70 | 6,774 | *AAC(3)-II,III,IV,VI,VIII,IX,X, AAC(6')-Ib/AAC(6')-II, APH(3'')-I, APH(6)-Ic/APH(6)-Id, CatB family, CTX-M family, SHV family, TEM family* | Aztreonam, Cefepime, Cefoxitin, Ciprofloxacin, Gentamicin, Levofloxacin, Tetracycline, Tobramycin, Trimethoprim/Sulfamethoxazole |
| CKP 33 | 5.59 Mbp | 122 | 99.7% | 56.9% | 104,665 | 81 | 6,164 | *AAC(3)-II,III,IV,VI,VIII,IX,X, APH(3')-III/APH(3')-IV/APH(3')-VI/APH(3')-VII, CTX-M family, SHV family* | Ciprofloxacin, Gentamicin, Levofloxacin, Piperacillin/Tazobactam, Tetracycline, Tobramycin |
| CKP 43 | 6.07 Mbp | 188 | 99.9% | 56.6% | 74,577 | 76 | 6,728 | *AAC(3)-II,III,IV,VI,VIII,IX,X, AAC(6')-Ib/AAC(6')-II, CatA1/CatA4 family, CatB family, CTX-M family, NDM family, OXA-1 family, OXA-2 family, SHV family, TEM family* | Cefepime, Cefoxitin, Ciprofloxacin, Gentamicin, Imipenem, Piperacillin/Tazobactam, Tobramycin, Trimethoprim/Sulfamethoxazole |
| CKP 44 | 5.60 Mbp | 199 | 97.8% | 57.11% | 51,961 | 60 | 6,310 | *AAC(3)-II,III,IV,VI,VIII,IX,X, APH(3'')-I, APH(6)-Ic/APH(6)-Id, CatB family, CTX-M family, NDM family, OXA-1 family, SHV family, TEM family* | Aztreonam, Cefepime, Cefoxitin, Ciprofloxacin, Gentamicin, Tetracycline, Tobramycin, Trimethoprim/Sulfamethoxazole |

a – Second CheckM; b – genes and phenotypes of antimicrobial resistance predicted by BV-BRC (CARD and NDARO databases).

**
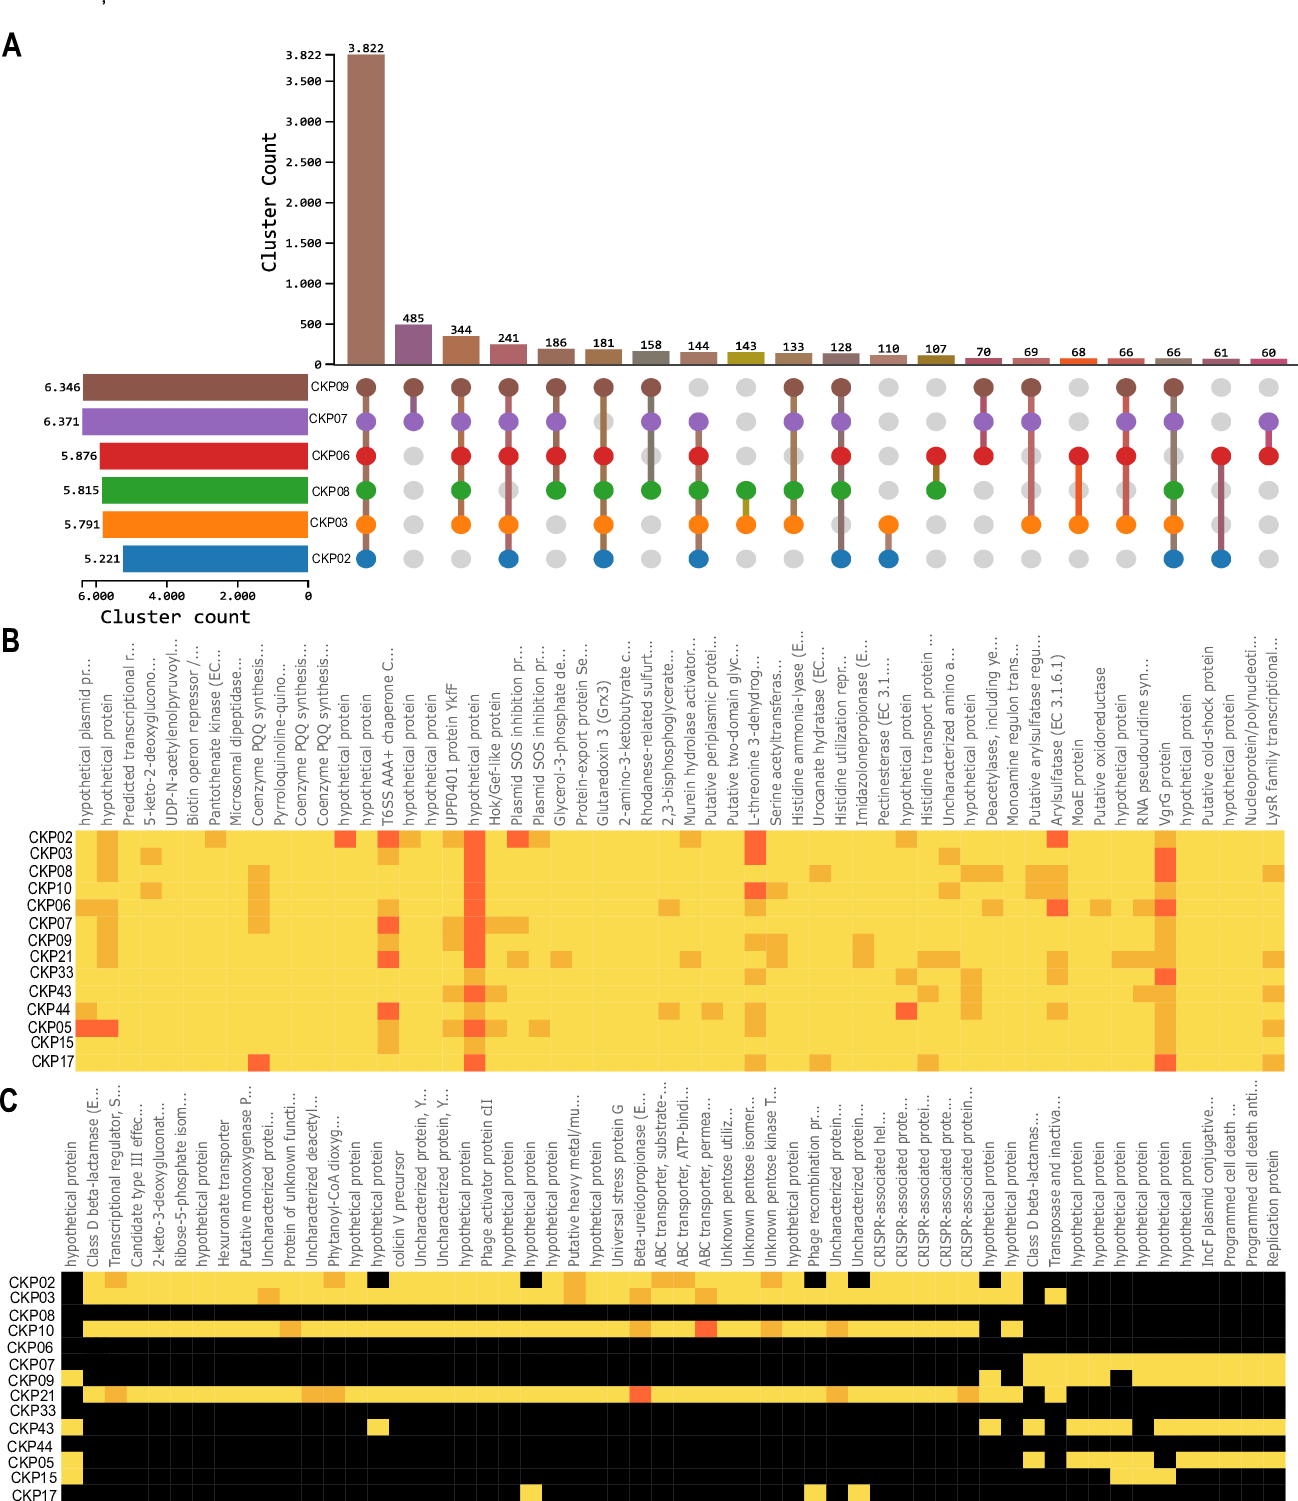
Figure1.** Functional characterizations of the identified genes. (A) Number of gene families shared among the sequenced isolates. 3,822 gene families were shared among all isolates compared in this analysis. (B) Examples of functional gene categories shared by all sequenced isolates. (C) Examples of functional gene categories shared only among phylogenetically related isolates (CKP02, CKP03, CKP10, CKP21). (D) Examples of functional gene categories identified in a single isolate (CKP02).
